# Supplementary material for: The immune escape signature predicts the prognosis and immunotherapy sensitivity for pancreatic ductal adenocarcinoma
Source: PubMed Central journal article supplement (PMC9486201; doi:10.3389/fonc.2022.978921), 2022-09-06

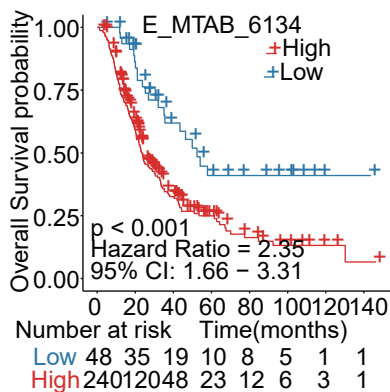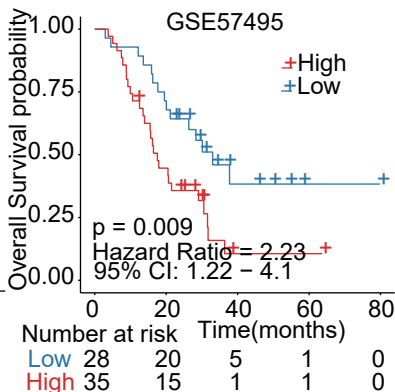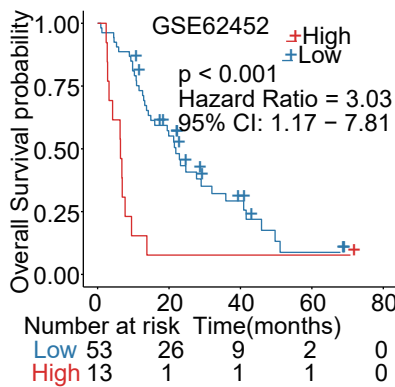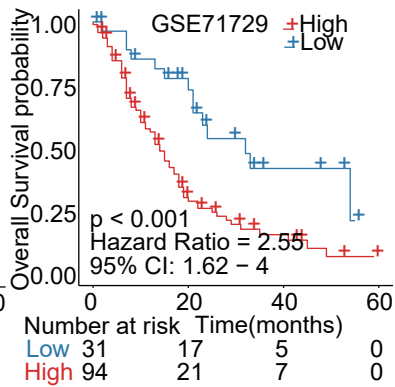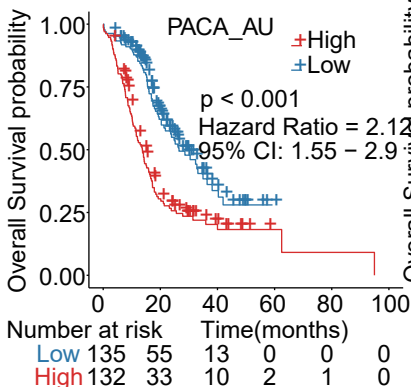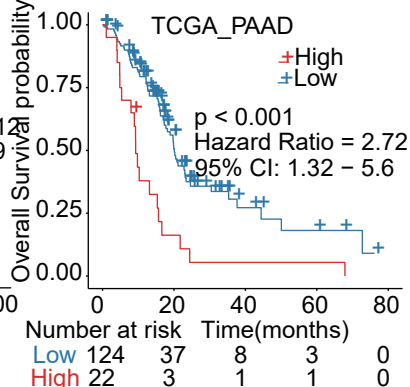

Supplement: Image_1.pdf [file Image_1.pdf]
