# Supplementary material for: The immune escape signature predicts the prognosis and immunotherapy sensitivity for pancreatic ductal adenocarcinoma
Source: PubMed Central journal article supplement (PMC9486201; doi:10.3389/fonc.2022.978921), 2022-09-06

**A**

VanAllen(2016)\_CTLA4\_meta melanoma

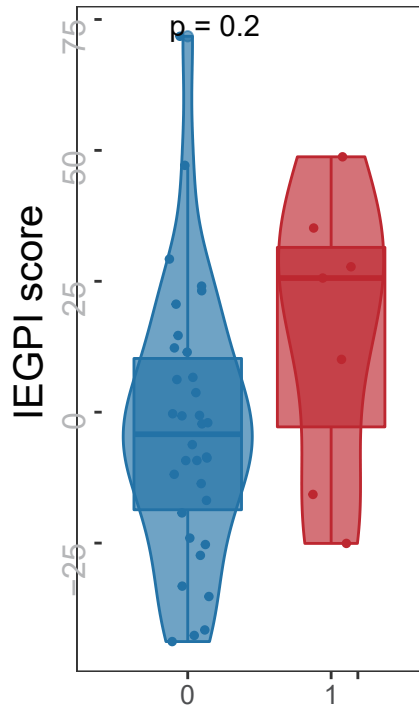**B**

Hugo(2016)\_PD1\_Melanoma

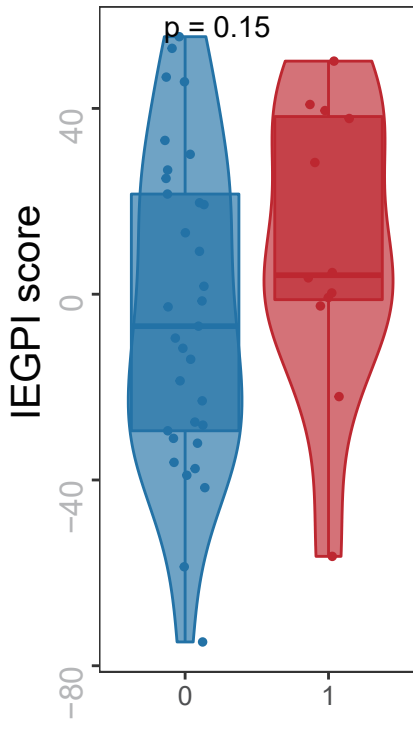**C**

GSE176307(2021)\_ICB\_BACI

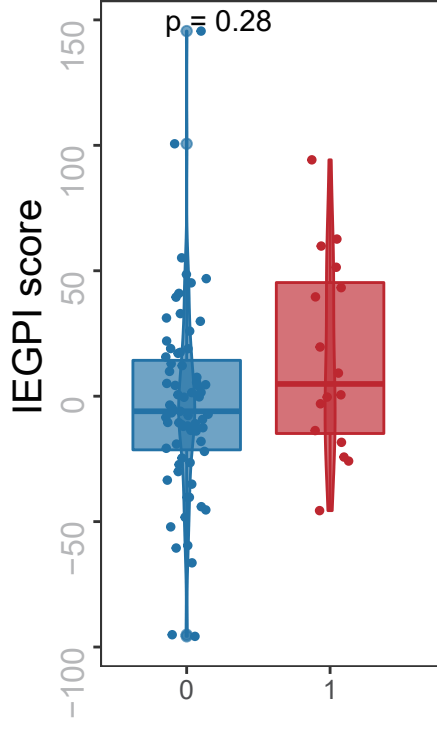**D**

GSE126044(2020)\_Lung\_PD1

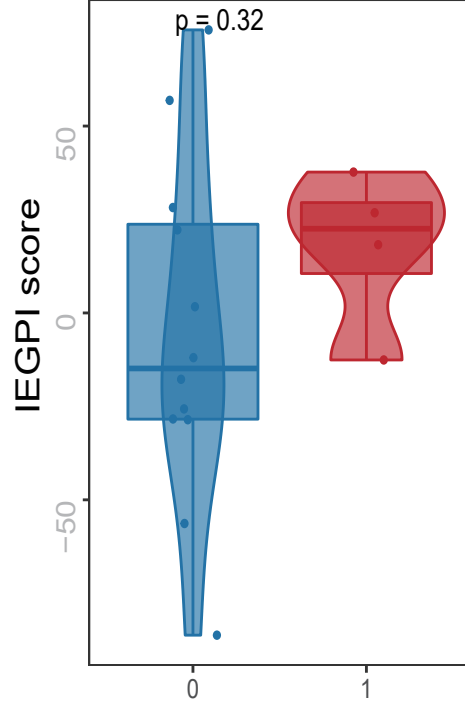

Supplement: Image_2.pdf [file Image_2.pdf]
